# Supplementary material
Source: publisher figshare collection journal article supplement (https://tandf.figshare.com/articles/dataset/_/999143)
Supplement: Supplementary file 1 [file 2]

Archive with 2 entries (2 files):
- ijgis-2013-0506-File010.pdf
- ijgis-2013-0506-File011.pdf
